# Supplementary material for: Neoadjuvant Treatment Lowers the Risk of Mesopancreatic Fat Infiltration and Local Recurrence in Patients with Pancreatic Cancer
Source: MDPI journal article supplement (doi:10.3390/cancers14010068), 2021-12-23
Supplement: s1 [file s1]

## Article

# Neoadjuvant Treatment Lowers the Risk of Mesopancreatic Fat Infiltration and Local Recurrence in Patients with Pancreatic Cancer

Sami-Alexander Safi, Lena Haeberle, Alexander Rehders, Stephen Fung, Sascha Vaghiri, Christoph Roderburg, Tom Luedde, Farid Ziayee, Irene Esposito, Georg Fluegen and Wolfram Trudo Knoefel

**Table S1.** Dosage and intervalls of neoadjuvant regimes.

| Neoadjuvant regime            | Dosage                                                                                                                                         | Intervall                                   |
|-------------------------------|------------------------------------------------------------------------------------------------------------------------------------------------|---------------------------------------------|
| Radiotherapy with Gemcitabine | 50 Gy and 300 mg/m <sup>2</sup>                                                                                                                | 1.8 Gy fractionized 1×/ week                |
| Gemcitabine                   | 1000 mg/m <sup>2</sup>                                                                                                                         | i.v. infusion 1×/ week                      |
| Nab-Paclitaxel                | 125 mg/m <sup>2</sup>                                                                                                                          | i.v. infusion 1×/ week                      |
| FOLFIRINOX                    | Oxaliplatin 85 mg/m <sup>2</sup><br>Leukovorin 400 mg/m <sup>2</sup><br>Irinotecan 180 mg/m <sup>2</sup><br>Fluorouracil 400 mg/m <sup>2</sup> | i.v. infusion 1× every 2 <sup>nd</sup> week |

Gy: grey; mg: milligram.

**Table S2:** Correlation Analysis of patients stratified according to positive and negative mesopancreatic infiltration, n=27. There was a heterogenous distribution of CAP-treatment response across mesopancreatic fat infiltration status. Correlation analysis was performed with the Pearson's test. \*\* indicates a p-value ≤ 0.01.

| Correlation analysis was performed with the Pearson's test. Indicates a p-value $\leq 0.05$ . |                                       |      |                                    |      |         |          |
|-----------------------------------------------------------------------------------------------|---------------------------------------|------|------------------------------------|------|---------|----------|
|                                                                                               | No mesopancreatic<br>fat infiltration |      | Mesopancreatic<br>fat infiltration |      | p-value | r-value  |
|                                                                                               | n=10                                  |      | n=17                               |      |         |          |
| Treatment<br>response                                                                         | n                                     | %    | n                                  | %    |         |          |
| CAP 0                                                                                         | 2                                     | 20.0 | 0                                  | 0    | 0.005** | +0.585** |
| CAP 1                                                                                         | 4                                     | 40.0 | 1                                  | 5.9  |         |          |
| CAP 2                                                                                         | 4                                     | 40.0 | 11                                 | 64.7 |         |          |
| CAP 3                                                                                         | 0                                     | 0.0  | 5                                  | 29.4 |         |          |

CAP: College of American Pathologists; CRM: circumferential resection margin
